# Supplementary material for: Serological Protection Rates against TBEV Infection in Blood Donors from a Highly Endemic Region in Southern Germany
Source: MDPI journal article supplement (doi:10.3390/vaccines11030522), 2023-02-23
Supplement: s1 [file s1]

## Supplementary Material

**Table S1.** Active vaccination status as evaluated by the RKI on the basis of primary care data.

| Age group  | Male (%) | Female (%) |
|------------|----------|------------|
| 20-24      | 22.5     | 26.4       |
| 25-29      | 18.5     | 21.9       |
| 30-34      | 18.0     | 19.5       |
| 35-39      | 18.9     | 22.7       |
| 40-44      | 21.5     | 23.7       |
| 45-49      | 22.8     | 24.1       |
| 50-54      | 23.5     | 25.5       |
| 55-59      | 23.9     | 24.8       |
| 60-64      | 19.1     | 20.9       |
| 65-69      | 22.7     | 22.8       |
| Mean value | 21.14    | 23.22      |

**Table S2.** Serological protection rate as evaluated from our study sample.

| Age group. | Male (%) | Female (%) |
|------------|----------|------------|
| 20-24      | 51,5     | 58,16      |
| 25-29      | 54,7     | 61,9       |
| 30-34      | 53       | 59,2       |
| 35-39      | 57,5     | 60         |
| 40-44      | 53,75    | 73         |
| 45-49      | 59,77    | 56         |
| 50-54      | 52,6     | 53,6       |
| 55-59      | 50,8     | 51,2       |
| 60-64      | 53,7     | 63,2       |
| 65-69      | 43       | 28,2       |
| Mean value | 52,2     | 57,0       |

**Table S3.** Comparison of the official vaccination rates vs. serological protection rates.

| Age group | Male (%) | Samples: confirmed serological protection/ total number of samples |
|-----------|----------|--------------------------------------------------------------------|
| 20-24     | 51,5     | 50/97                                                              |
| 25-29     | 54,7     | 81/148                                                             |
| 30-34     | 53       | 61/115                                                             |
| 35-39     | 57,5     | 41/71                                                              |
| 40-44     | 53,75    | 43/80                                                              |
| 45-49     | 59,77    | 52/87                                                              |
| 50-54     | 52,6     | 91/173                                                             |
| 55-59     | 50,8     | 93/183                                                             |
| 60-64     | 53,7     | 80/149                                                             |
| 65-69     | 43       | 40/93                                                              |
| In total: | 52,2     | 632/1196                                                           |

**Table S4.** Numbers of percentages of serological protection rate in our study sample (samples confirmed serological protection/ total number of samples).

| Age group | Female (%) | Samples: confirmed serological protection/ total number of samples |
|-----------|------------|--------------------------------------------------------------------|
| 20-24     | 58,16      | 89/153                                                             |
| 25-29     | 61,9       | 73/118                                                             |
| 30-34     | 59,2       | 45/76                                                              |
| 35-39     | 60         | 21/35                                                              |
| 40-44     | 73         | 54/74                                                              |
| 45-49     | 56         | 42/75                                                              |
| 50-54     | 53,6       | 74/138                                                             |
| 55-59     | 51,2       | 64/125                                                             |
| 60-64     | 63,2       | 43/68                                                              |
| 65-69     | 28,2       | 13/46                                                              |
| In total: | 57,0       | 518/908                                                            |

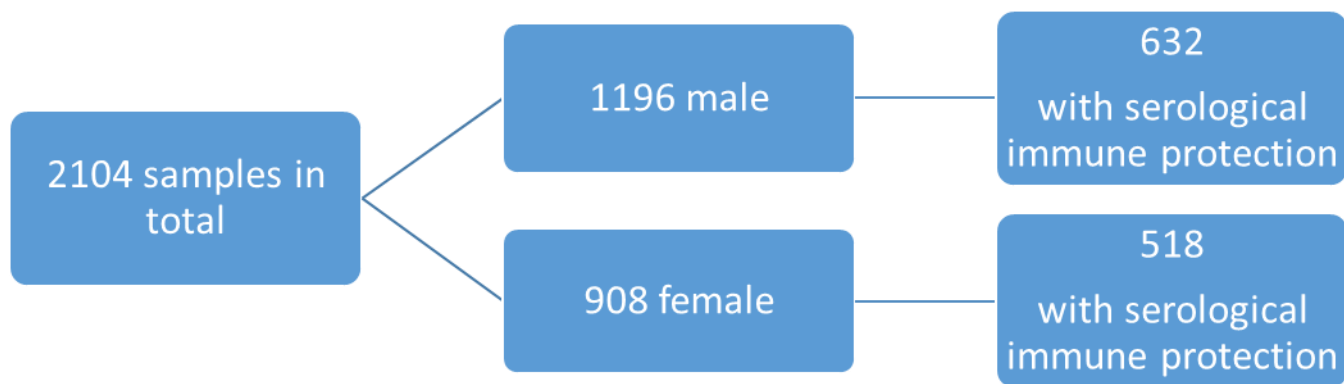

**Figure S1.** Distribution of the 2104 bloodsamples (aged 20-69) from Ortenaukreis in terms of sex and serological immune protection status.
